# Supplementary material for: Discrepancies in Antimicrobial Susceptibility between the JP2 and the Non-JP2 Genotype of Aggregatibacter actinomycetemcomitans
Source: MDPI journal article supplement (doi:10.3390/antibiotics11030317), 2022-02-27
Supplement: s1 [file s1]

**Table S1.**

**The 160 strains *A. actinomycetemcomitans* strains used in the present work.** In total, 32 JP2 strains (1-32), 41 Ghanaian (Gh) (33-73), and 47 Swedish (Sw) serotype b strains, including strain J33 (74-120). In addition, 10 serotype a, and 10 serotype c strains from both Ghana and Sweden (120-160).

Cau, Caucasian descent, af, African descent

| Serial number | Strain number used in this study | Isolate number in strain collections | Origin of strains |
|---------------|----------------------------------|--------------------------------------|-------------------|
| 1             | J 1                              | HK 921                               | USA               |
| 2             | J 2                              | HK 1651                              | Gh                |
| 3             | J 3                              | HK 1519                              | Cape Verde        |
| 4             | J 4                              | HK 1702                              | Brazil            |
| 5             | J 5                              | HK 909                               | unknown           |
| 6             | J 6                              | KLA1-08                              | Sw - cau          |
| 7             | J 7                              | BLA1-08                              | Sw - cau          |
| 8             | J 8                              | 520-01                               | Sw - cau          |
| 9             | J 9                              | 246 A-04                             | Sw- af            |
| 10            | J 10                             | G24                                  | Gh                |
| 11            | J 11                             | G36                                  | Gh                |
| 12            | J 12                             | LA 640                               | USA               |
| 13            | J 13                             | LA 806                               | USA               |
| 14            | J 14                             | 090-10                               | Sw - cau          |
| 15            | J 15                             | 196A1-10                             | Sw - cau          |
| 16            | J 16                             | 437 G                                | Gh                |
| 17            | J 17                             | 488 G                                | Gh                |
| 18            | J 18                             | 524 G                                | Gh                |
| 19            | J 19                             | 654 G                                | Gh                |
| 20            | J 20                             | 666 G                                | Gh                |
| 21            | J 21                             | 3364 CV                              | Cape Verde        |
| 22            | J 22                             | 115A-11                              | Sw - cau          |
| 23            | J 23                             | 352B-11                              | Sw - cau          |
| 24            | J 24                             | 855G-11                              | Gh                |

|    |         |          |            |
|----|---------|----------|------------|
| 25 | J 25    | 841G-11  | Gh         |
| 26 | J 26    | 809G-11  | Gh         |
| 27 | J 27    | 245-11   | Sw - cau   |
| 28 | J 28    | P48      | Cape Verde |
| 29 | J 29    | 557 A-12 | Sw-af      |
| 30 | J 30    | 338 A-13 | Sw - cau   |
| 31 | J 31    | 342 A-13 | Sw-af      |
| 32 | J 32    | 408 A-13 | Sw-af      |
| 33 | 001 Ghb | 062 A    | Gh         |
| 34 | 028 Ghb | 197 A    | Gh         |
| 35 | 065 Ghb | 283 A    | Gh         |
| 36 | 071 Ghb | 286 A    | Gh         |
| 37 | 153 Ghb | 394 A    | Gh         |
| 38 | 205 Ghb | 367 A    | Gh         |
| 39 | 212 Ghb | 448 A    | Gh         |
| 40 | 217 Ghb | 457 A    | Gh         |
| 41 | 234 Ghb | 035 A    | Gh         |
| 42 | 369 Ghb | 180 A    | Gh         |
| 43 | 370 Ghb | 182 C    | Gh         |
| 44 | 443 Ghb | 001 A    | Gh         |
| 45 | 467 Ghb | 063 A    | Gh         |
| 46 | 470 Ghb | 067 A    | Gh         |
| 47 | 486 Ghb | 083 A    | Gh         |
| 48 | 490 Ghb | 096 A    | Gh         |
| 49 | 492 Ghb | 100 A    | Gh         |
| 50 | 493 Ghb | 136 A    | Gh         |
| 51 | 519 Ghb | 158 A    | Gh         |
| 52 | 540 Ghb | 186 A    | Gh         |
| 53 | 575 Ghb | 204 B    | Gh         |
| 54 | 581 Ghb | 208 A    | Gh         |
| 55 | 585 Ghb | 220 A    | Gh         |
| 56 | 589 Ghb | 284 A    | Gh         |
| 57 | 605 Ghb | 299 A    | Gh         |

|    |         |          |    |
|----|---------|----------|----|
| 58 | 619 Ghb | 372 A    | Gh |
| 59 | 621 Ghb | 374 A    | Gh |
| 60 | 624 Ghb | 376 A    | Gh |
| 61 | 633 Ghb | 392 A    | Gh |
| 62 | 638 Ghb | 222 A    | Gh |
| 63 | 640 Ghb | 223 A    | Gh |
| 64 | 652 Ghb | 412 A    | Gh |
| 65 | 662 Ghb | 432 A    | Gh |
| 66 | 670 Ghb | 423 A    | Gh |
| 67 | 683 Ghb | 492 A    | Gh |
| 68 | 702 Ghb | 439 A    | Gh |
| 69 | 708 Ghb | 221 A    | Gh |
| 70 | 716 Ghb | 448 A    | Gh |
| 71 | 727 Ghb | 169 A    | Gh |
| 72 | 744 Ghb | 326 A    | Gh |
| 73 | 769 Ghb | 485 A    | Gh |
|    |         |          |    |
| 74 | 11 Ub   | 908-2000 | Sw |
| 75 | 12 Ub   | 612-2002 | Sw |
| 76 | 14 Ub   | 114-2005 | Sw |
| 77 | 27 Ub   | 699-2000 | Sw |
| 78 | 40 Ub   | 547-2004 | Sw |
| 79 | 54 Ub   | 760-2003 | Sw |
| 80 | 66 Ub   | 762-2002 | Sw |
| 81 | 78 Ub   | 496-2002 | Sw |
| 82 | 107 Ub  | 731-2002 | Sw |
| 83 | 112 Ub  | 704-2001 | Sw |
| 84 | 119 Ub  | 96-2000  | Sw |
| 85 | 128 Ub  | 132-2002 | Sw |
| 86 | 135 Ub  | 780-2003 | Sw |
| 87 | 137 Ub  | 700-2001 | Sw |
| 88 | 139 Ub  | 179-2001 | Sw |
| 89 | 145 Ub  | 96-2005  | Sw |
| 90 | 146 Ub  | 54-2006  | Sw |

|     |        |          |    |
|-----|--------|----------|----|
| 91  | 147 Ub | 235-2006 | Sw |
| 92  | 148 Ub | 70-2008  | Sw |
| 93  | 153 Ub | 746-2002 | Sw |
| 94  | 160 Ub | 700-2002 | Sw |
| 95  | 167 Ub | 287-2009 | Sw |
| 96  | 172 Ub | 380-2009 | Sw |
| 97  | 177 Ub | 582-2009 | Sw |
| 98  | 184 Ub | 17-2010  | Sw |
| 99  | 185 Ub | 38-2010  | Sw |
| 100 | 189 Ub | 135-2010 | Sw |
| 101 | 195 Ub | 214-2010 | Sw |
| 102 | 196 Ub | 248-2010 | Sw |
| 103 | 197 Ub | 249-2010 | Sw |
| 104 | 200 Ub | 364-2010 | Sw |
| 105 | 201 Ub | 490-2010 | Sw |
| 106 | 208 Ub | 73-2011  | Sw |
| 107 | 219 Ub | 349-2011 | Sw |
| 108 | 231 Ub | 576-2011 | Sw |
| 109 | 234 Ub | 629-2011 | Sw |
| 110 | 240 Ub | 71-2012  | Sw |
| 111 | 244 Ub | 115-2012 | Sw |
| 112 | 251 Ub | 298-2012 | Sw |
| 113 | 255 Ub | 499-2012 | Sw |
| 114 | 260 Ub | 542-2012 | Sw |
| 115 | 266 Ub | 576-2012 | Sw |
| 116 | 279 Ub | 508-2007 | Sw |
| 117 | 281 Ub | 233-2004 | Sw |
| 118 | 282 Ub | 77-2002  | Sw |
| 119 | 290 Ub | 336-2008 | Sw |
| 120 | J 33   | 456 A-13 | Sw |
| 121 | 14 Gha | 187 A    | Gh |
| 122 | 35 Gha | 208 A    | Gh |
| 123 | 61 Gha | 272 A    | Gh |

|     |         |          |    |
|-----|---------|----------|----|
| 124 | 63 Gha  | 278 A    | Gh |
| 125 | 79 Gha  | 295 A    | Gh |
| 126 | 88 Gha  | 300 A    | Gh |
| 127 | 117 Gha | 358 A    | Gh |
| 128 | 123 Gha | 365 A    | Gh |
| 129 | 131 Gha | 368 B    | Gh |
| 130 | 135 Gha | 372 B    | Gh |
| 131 | 3 Ghc   | 128 A    | Gh |
| 132 | 16 Ghc  | 187 B    | Gh |
| 133 | 27 Ghc  | 195 A    | Gh |
| 134 | 75 Ghc  | 292 A    | Gh |
| 135 | 86 Ghc  | 299 B    | Gh |
| 136 | 92 Ghc  | 304 A    | Gh |
| 137 | 98 Ghc  | 323 A    | Gh |
| 138 | 109 Ghc | 347 A    | Gh |
| 139 | 121 Ghc | 363 B    | Gh |
| 140 | 129 Ghc | 368 A    | Gh |
| 141 | 1 Uc    | 686-2001 | Sw |
| 142 | 3 Uc    | 553-2002 | Sw |
| 143 | 4 Uc    | 483-2003 | Sw |
| 144 | 5 Uc    | 28-2012  | Sw |
| 145 | 9 Uc    | 544-2005 | Sw |
| 146 | 16 Uc   | 375-2002 | Sw |
| 147 | 17 Uc   | 35-2004  | Sw |
| 148 | 22 Uc   | 276-2004 | Sw |
| 149 | 24 Uc   | 37-2003  | Sw |
| 150 | 31 Uc   | 141-2002 | Sw |
| 151 | 7 Ua    | 522-2005 | Sw |
| 152 | 8 Ua    | 22-2004  | Sw |
| 153 | 13 Ua   | 178-2001 | Sw |
| 154 | 18 Ua   | 400-2005 | Sw |

|     |       |          |    |
|-----|-------|----------|----|
| 155 | 19 Ua | 648-2001 | Sw |
| 156 | 21 Ua | 371-2005 | Sw |
| 157 | 26 Ua | 182-2007 | Sw |
| 158 | 28 Ua | 650-2003 | Sw |
| 159 | 30 Ua | 659-2001 | Sw |
| 160 | 33 Ua | 549-2003 | Sw |

---

**Table S2. Comparison of MIC values for *A. actinomycetemcomitans* from different studies.**

MIC data given as two-fold dilutions

| Antimicrobial agent     | MIC range     | MIC <sub>50</sub> | MIC <sub>90</sub> | Number of strains, [reference] |
|-------------------------|---------------|-------------------|-------------------|--------------------------------|
| <b>Amoxicillin</b>      | 0.125-2.0     | 0.5               | 1                 | 73, [25]                       |
|                         | 0.064-16      | 0.5               | 1                 | 40 [27]                        |
|                         | 0.25-2        | 1                 | 2                 | 24 [23]                        |
|                         | 0.064-8       | 0.25              | 2                 | 50 [22]                        |
|                         | 0.25-2        | 0.25              | 2                 | 257 [28]                       |
|                         | 0.25-2        | 0.5               | 1                 | 160 [present]                  |
| <b>Benzylpenicillin</b> | 0.5-8         | 2                 | 4                 | 73 [25]                        |
|                         | 0.125-8       | 2                 | 8                 | 50 [22]                        |
|                         | 0.125-8       | 1                 | 4                 | 160 [present]                  |
| <b>Azithromycin</b>     | 0.064-2       | 1                 | 1                 | 73 [25]                        |
|                         | <0.064->32    | 0.5               | 32                | 24 [23]                        |
|                         | 0.125-64      | 4                 | 16                | 40 [27]                        |
|                         | 0.125 - 4     | 2                 | 4                 | 45 [24]                        |
|                         | 0.064 - 4     | 0.5               | 1                 | 160 [present]                  |
|                         |               |                   |                   |                                |
| <b>Cefotaxime</b>       | 0.5-8         | 0.5               | 2                 | 40 [27]                        |
|                         | <0.016 - 0.25 | 0.064             | 0.064             | 160 [present]                  |
| <b>Tetracycline</b>     | 0.25-4        | 0.5               | 1                 | 52 [25]*                       |
|                         | 0.25-1        | 1                 | 1                 | 21 [25]                        |
|                         | 0.032-16      | 0.25              | 0.5               | 50 [22]                        |
|                         | 0.125-16      | 2                 | 8                 | 40 [27]                        |
|                         | <0.125 -1     | 0.5               | 1                 | 160 [present]                  |
| <b>Quinolones</b>       |               |                   |                   |                                |
| Moxifloxacin            | 0.064-4       | 0.125             | 0.5               | 40 [27]                        |
|                         | 0.0064-0.032  | 0.0023            | 0.032             | 45 [24]                        |
| Trovafloxacin           | ≤0.64-0.12    | ≤0.064            | ≤0.064            | 73 [25]                        |
| Ciprofloxacin           | 0.01-0.08     | 0.03              | 0.04              | 50 [22]                        |
|                         | <0.002-0.006  | 0.03              | 0.006             | 45 [24]                        |
| Levofloxacin            | <0.002 - 0.16 | 0.004             | 0.008             | 160 [present]                  |
| <b>Metronidazole</b>    | 64->256       | >256              | >256              | 40 [27]                        |
|                         | 0.25->64      | 24                | >64               | 24 [23]                        |
|                         | 32->512       | 64                | 128               | 50 [22]                        |
|                         | 0.25-128      | 16                | 16                | 73 [25]                        |
|                         | 2- >256       | 8                 | >256              | 45 [24]                        |
|                         | 0.5 - >256    | 4                 | 128               | 160 [present]                  |

\* Non-oral strains

**Table S3. The relationship between MIC values for benzylpenicillin (BP) and metronidazole in 160 strains of *Aggregatibacter actinomycetemcomitans*.**

| MIC<br>BP<br>(mg/L) | MIC metronidazole (mg/L) |   |    |    |    |    |    |     |      |
|---------------------|--------------------------|---|----|----|----|----|----|-----|------|
|                     | 1                        | 2 | 4  | 8  | 16 | 32 | 64 | 128 | ≥256 |
| 8                   |                          | 1 |    | 1  | 1  | 3  | 2  | 2   | 1    |
| 4                   | 1                        | 1 | 3  | 7  | 5  |    |    |     | 4    |
| 2                   | 2                        | 6 | 12 | 12 | 7  | 4  | 3  | 1   | 2    |
| 1                   |                          | 2 | 8  | 5  | 5  | 5  | 1  | 1   | 3    |
| 0.5                 |                          | 1 | 1  | 2  | 5  | 1  | 1  |     |      |
| 0.25                | 2                        | 5 | 9  | 3  | 4  | 2  |    |     |      |
| 0.125               | 1                        | 6 | 4  |    |    |    |    |     |      |

The number of strains with respective MIC values is shown in the table.
